# Supplementary material for: A novel shape-stabilization strategy for phase change thermal energy storage
Source: Royal Society of Chemistry journal article supplement (doi:10.1039/c9ta01496a), 2019-01-01
Supplement: c9ta01496a1.pdf [file c9ta01496a1.pdf]

## Supporting Information

### **A novel shape-stabilization strategy for phase change thermal energy storage**

*Changhui Liu<sup>1</sup>, Ze Xu<sup>1</sup>, Yan Song<sup>1</sup>, Peizhao Lv<sup>1</sup>, Jiateng Zhao<sup>1</sup>, Chenzhen Liu<sup>1</sup>, Yutao Huo<sup>1</sup>, Ben Xu<sup>2</sup>, Chunyu Zhu<sup>3</sup>, Zhonghao Rao<sup>1</sup> \**

<sup>1</sup>Laboratory of Energy Storage and Heat Transfer, School of Electrical and Power Engineering, China University of Mining and Technology, Xuzhou, 221116, China. Email: [raozhonghao@cumt.edu.cn](mailto:raozhonghao@cumt.edu.cn), <sup>2</sup>Department of Mechanical Engineering, University of Texas Rio Grande Valley, Edinburg, TX 78539, USA. <sup>3</sup>Faculty of Engineering, Hokkaido University, Sapporo 060-8628, Japan.

**Fig. S1** (a) EDS spectra of HCPs-PCM/II; (b) EDS spectra of HCPs-PCM/III.

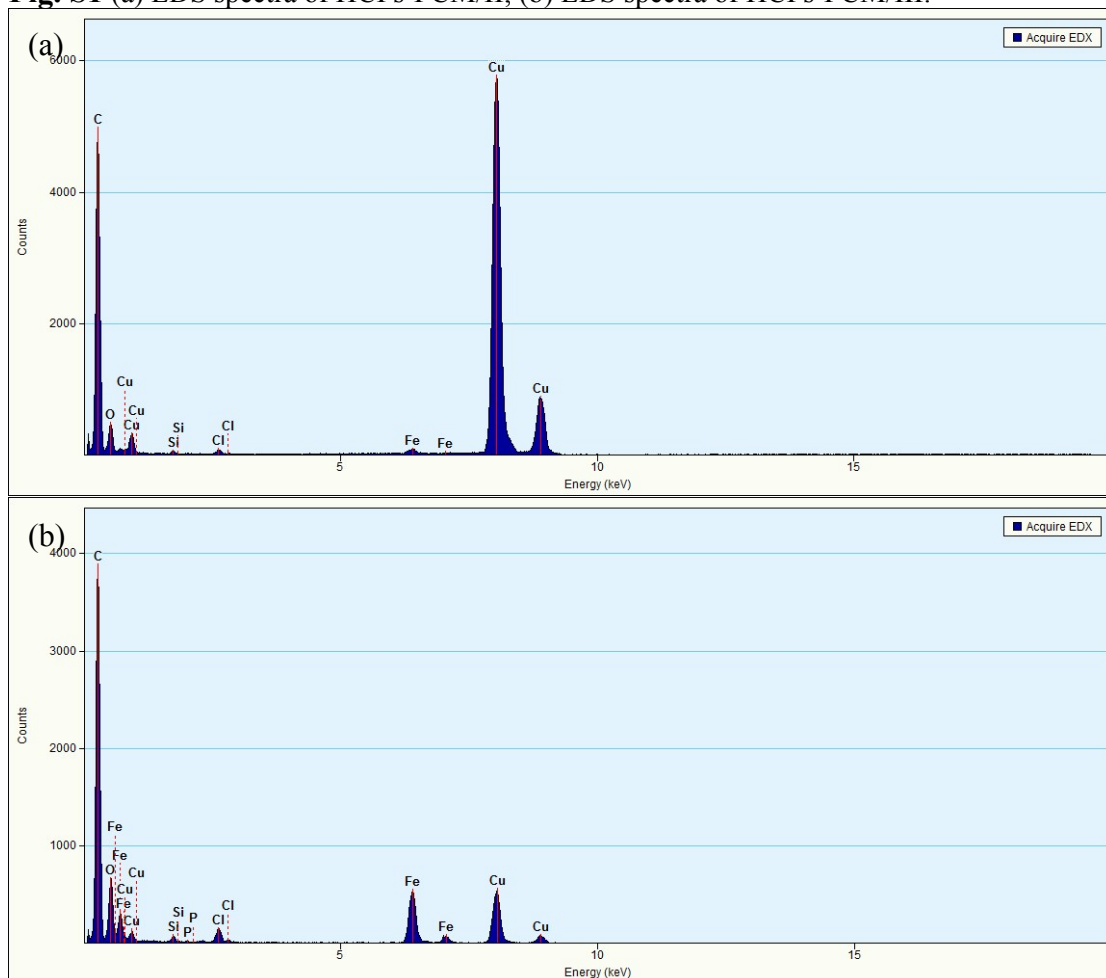

**Fig. S2** Magnetic property test for HCPs-PCM/II(1.5) and HCPs-PCM/III(1.5).

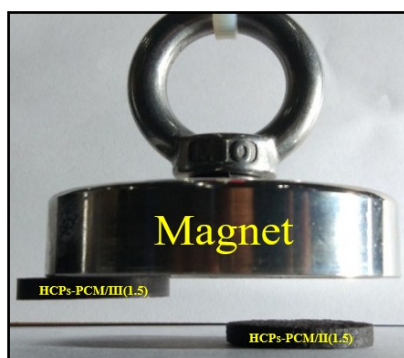

**Fig. S3** Proposed mechanism for the formation of HCPs (a), and Fe<sub>3</sub>O<sub>4</sub> (b);

(a)

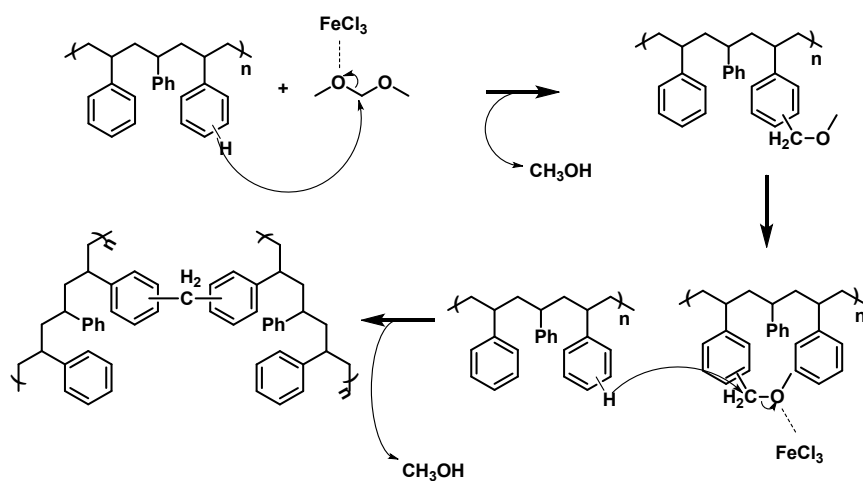

(b)

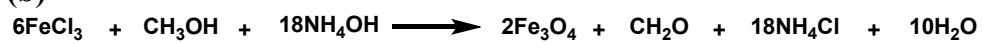

**Fig. S4** XPS survey spectra of (a) HCPs-PCM/II and (b) HCPs-PCM/III.

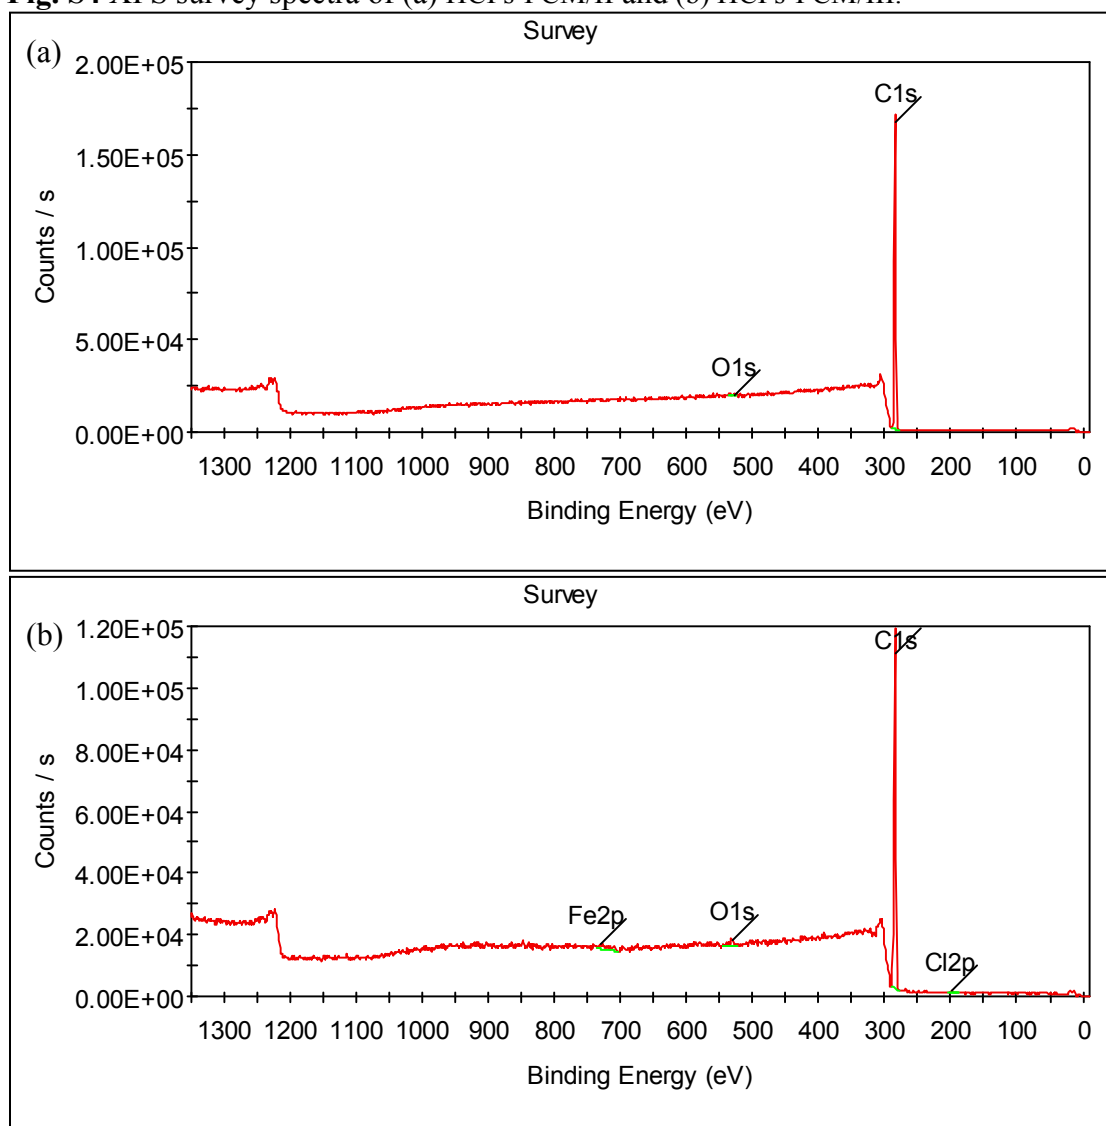

**Fig. S5** SEM image of (a) HCP, (b) paraffin, (c) HCPs-PCM/III (1.0), (d) HCPs-PCM/III (1.5), (e) HCPs-PCM/III (2.0), (f) HCPs-PCM/III (2.5), (g) HCPs-PCM/III (3.0).

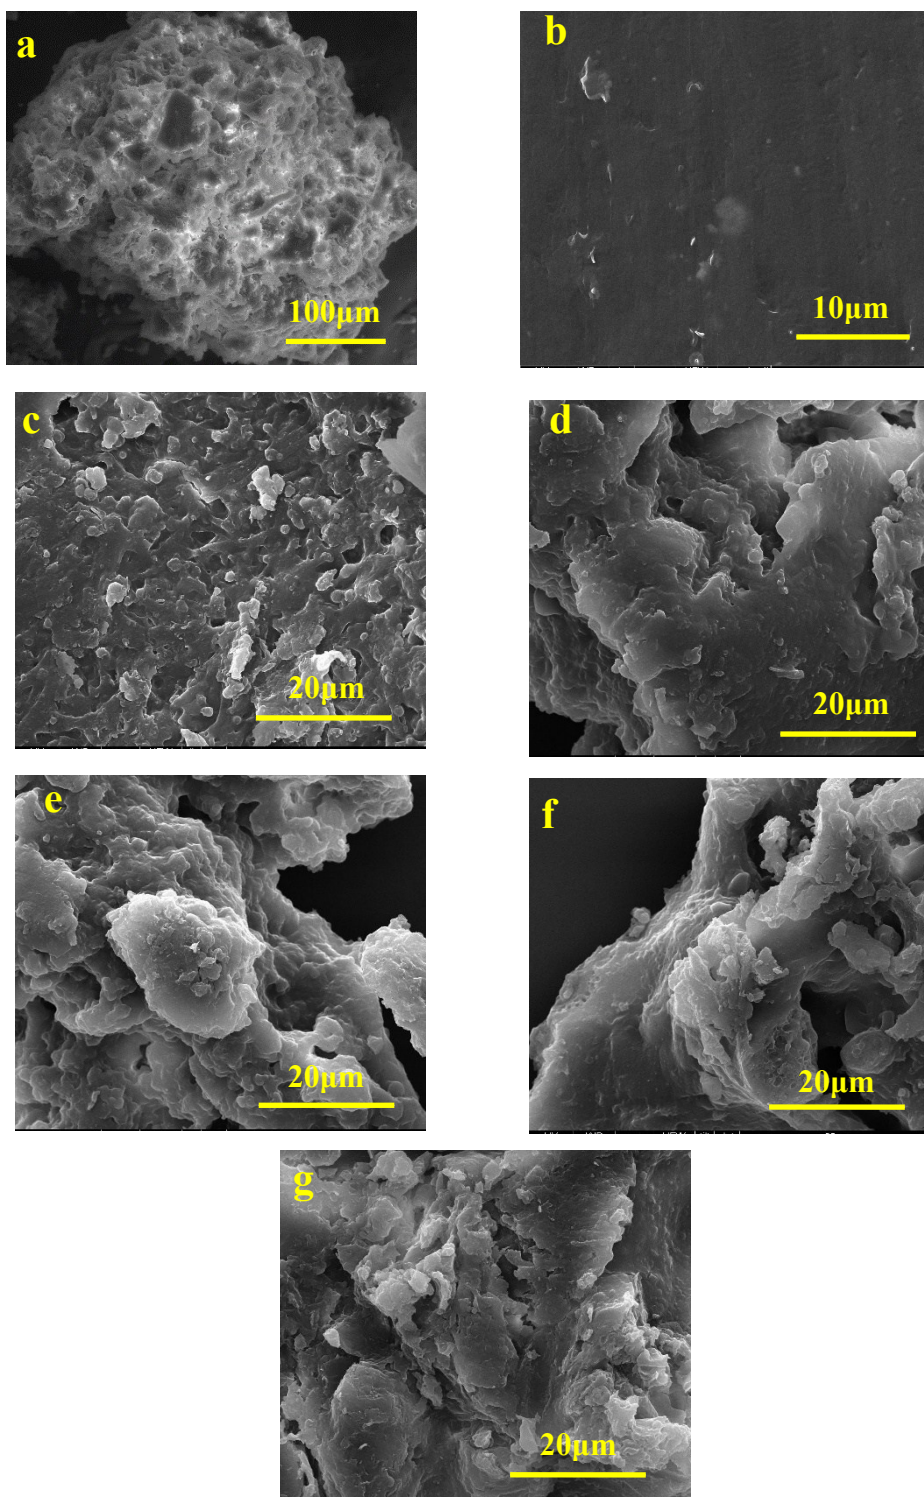

**Fig. S6** The mass loss of the HCPs-PCM/III (n) samples after having been heated at 80 °C for 5 hours.

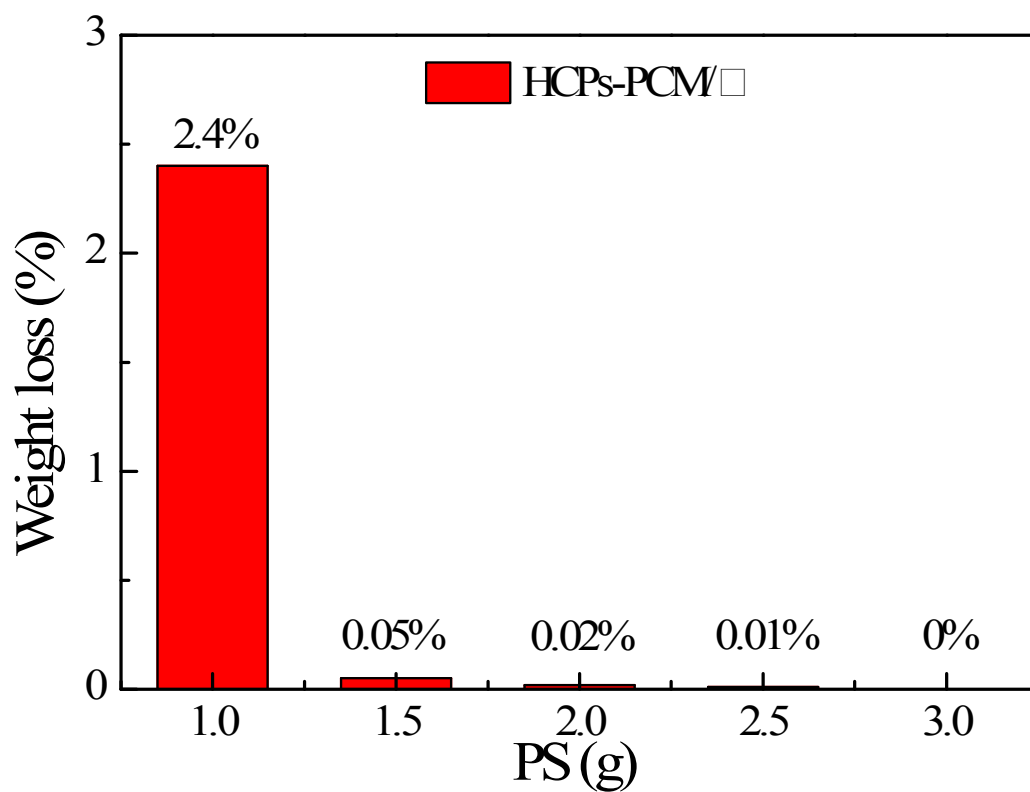

**Fig. S7** SEM images of (a) 0.4 g GR , (b) 0.4 g SiC, (c) 0.4 g Fe<sub>3</sub>O<sub>4</sub>, (d) 0.4 g EG incorporated HCPs-PCM/III composites;

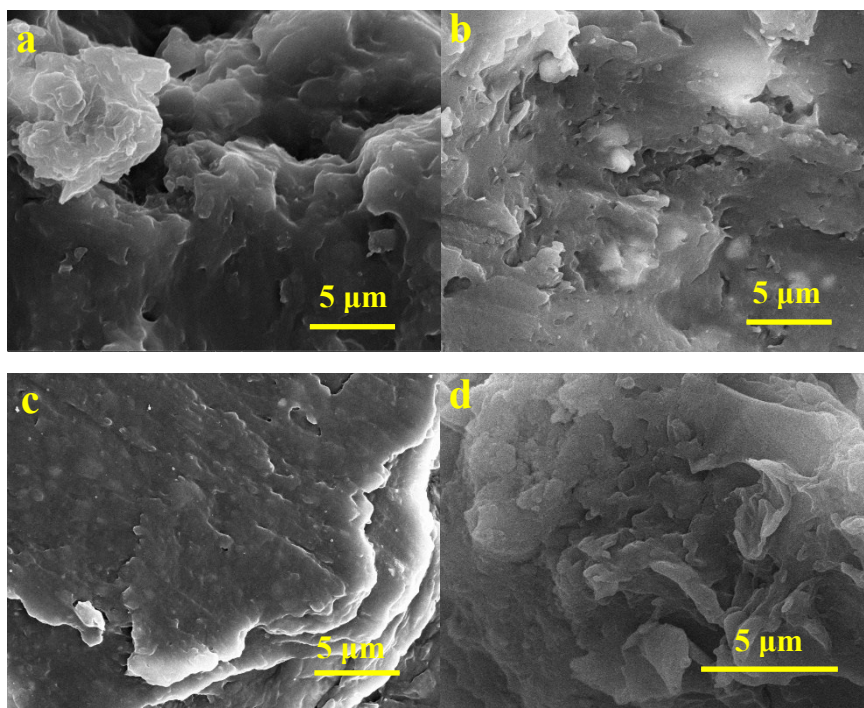



**Fig. S8** DSC curves of HCPs-PCM/III (1.5) composites with varies nanofillers.(a) HCPs-PCM/III (1.5)-GR (0.1); (b) HCPs-PCM/III (1.5)-SiC (0.1); (c) HCPs-PCM/III (1.5)-Fe<sub>3</sub>O<sub>4</sub>(0.1); (d) HCPs-PCM/III (1.5)-EG (0.1); (e) HCPs-PCM/III (1.5)-EG (0.2); (f) HCPs-PCM/III (1.5)-EG (0.3); (g) HCPs-PCM/III (1.5)-EG (0.4).

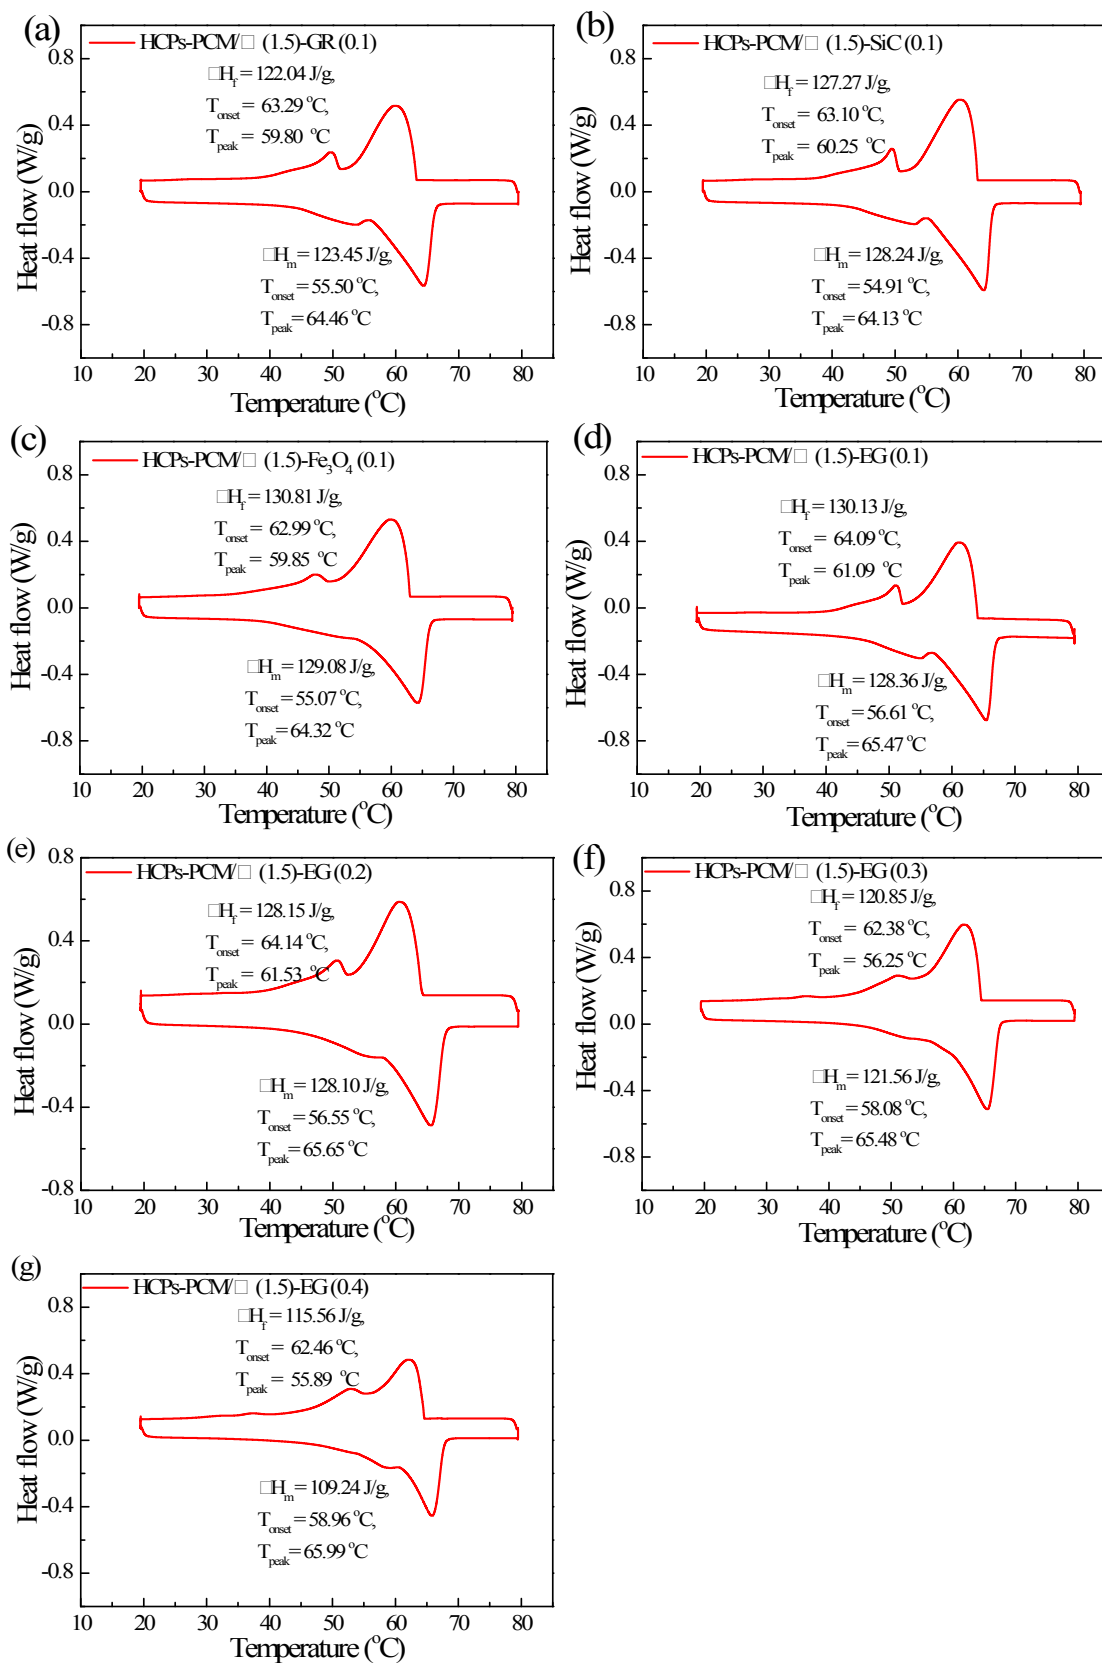

**Table S1** BET value of HCPs.

| Samples | BET surface area/(m <sup>2</sup> /g) | Pore volume /(cm <sup>3</sup> /g) | Average pore diameter /(nm) |
|---------|--------------------------------------|-----------------------------------|-----------------------------|
| HCPs1   | 364                                  | 0.26                              | 2.89                        |
| HCPs2   | 361                                  | 0.26                              | 2.91                        |

HCPs1: prepared in the absence of paraffin; HCPs2: prepared in the presence of paraffin.
